# Supplementary material for: Gut Micro- and Mycobiota in Preeclampsia: Bacterial Composition Differences Suggest Role in Pathophysiology
Source: MDPI journal article supplement (doi:10.3390/biom13020346), 2023-02-10
Supplement: s1 [file s1]

## Supplementary Material

**Table S1.** Summary of questionnaire answers regarding gastrointestinal symptoms.<sup>1</sup>

| Question                                                                       | Answer                   | C (N (%))  | PE (N (%)) | P-value |
|--------------------------------------------------------------------------------|--------------------------|------------|------------|---------|
| 1. After gestational week (g.w.) 20: How often do you have bowel movements?    | < 3 times/week           | 2 (6.9%)   | 0          | 0.024 * |
|                                                                                | 3–5 times/week           | 11 (37.9%) | 6 (26.1%)  |         |
|                                                                                | 1 time/day               | 13 (44.8%) | 8 (34.8%)  |         |
|                                                                                | >1 time/day              | 3 (10.3%)  | 9 (39.1%)  |         |
|                                                                                | Total:                   | N = 29     | N = 23     |         |
| 2. After g.w. 20: How often is the stool loose/watery?                         | Never or rarely          | 20 (69.0%) | 8 (36.4%)  | 0.059   |
|                                                                                | Around 25% of the time   | 2 (6.9%)   | 7 (31.8%)  |         |
|                                                                                | Around 50% of the time   | 5 (17.2%)  | 4 (18.2%)  |         |
|                                                                                | Around 75% of the time   | 2 (6.9%)   | 3 (13.6%)  |         |
|                                                                                | Always, 100% of the time | 0          | 0          |         |
| Total:                                                                         | N = 29                   | N = 22     |            |         |
| 3. After g.w. 20: How often is the stool hard?                                 | Never or rarely          | 9 (31.0%)  | 7 (29.2%)  | 0.315   |
|                                                                                | Around 25% of the time   | 4 (13.8%)  | 9 (37.5%)  |         |
|                                                                                | Around 50% of the time   | 6 (20.7%)  | 3 (12.5%)  |         |
|                                                                                | Around 75% of the time   | 8 (27.6%)  | 5 (20.8%)  |         |
|                                                                                | Always, 100% of the time | 2 (6.9%)   | 0          |         |
| Total:                                                                         | N = 29                   | N = 24     |            |         |
| 4. After g.w. 20: How often have you noticed blood in the stool?               | Never or rarely          | 29 (100%)  | 23 (95.8%) | 0.272   |
|                                                                                | Sometimes                | 0          | 1 (4.2%)   |         |
|                                                                                | Often                    | 0          | 0          |         |
|                                                                                | Most of the time         | 0          | 0          |         |
|                                                                                | Always                   | 0          | 0          |         |
| Total:                                                                         | N = 29                   | N = 24     |            |         |
| 5. After g.w. 20: How often have you noticed that the stool was black?         | Never or rarely          | 14 (48.3%) | 15 (62.5%) | 0.414   |
|                                                                                | Sometimes                | 7 (24.1%)  | 3 (12.5%)  |         |
|                                                                                | Often                    | 5 (17.2%)  | 4 (16.7%)  |         |
|                                                                                | Most of the time         | 3 (10.3%)  | 2 (8.3%)   |         |
|                                                                                | Always                   | 0          | 0          |         |
| Total:                                                                         | N = 29                   | N = 24     |            |         |
| 6. After g.w. 20: How often have you noticed mucus in the stool?               | Never or rarely          | 23 (82.1%) | 21 (91.3%) | 0.486   |
|                                                                                | Sometimes                | 4 (14.3%)  | 1 (4.3%)   |         |
|                                                                                | Often                    | 1 (3.6%)   | 1 (4.3%)   |         |
|                                                                                | Most of the time         | 0          | 0          |         |
|                                                                                | Always                   | 0          | 0          |         |
| Total:                                                                         | N = 28                   | N = 23     |            |         |
| 7. After g.w. 20: How often do you experience nausea, acid reflux or vomiting? | Never or rarely          | 8 (27.6%)  | 8 (34.8%)  | 0.748   |
|                                                                                | < 1 day/month            | 0          | 0          |         |
|                                                                                | 1 day/month              | 0          | 0          |         |
|                                                                                | 2–3 days/month           | 4 (13.8%)  | 3 (13.0%)  |         |
|                                                                                | 1 day/week               | 10 (34.5%) | 4 (17.4%)  |         |
|                                                                                | >1 day/week              | 5 (17.2%)  | 5 (21.7%)  |         |
|                                                                                | Every day                | 2 (6.9%)   | 3 (13.0%)  |         |
| Total:                                                                         | N = 29                   | N = 23     |            |         |
|                                                                                | Never or rarely          | 15 (51.7%) | 14 (58.3%) | 0.799   |

|                                                               |                |           |           |
|---------------------------------------------------------------|----------------|-----------|-----------|
|                                                               | < 1 day/month  | 2 (6.9%)  | 2 (8.3%)  |
|                                                               | 1 day/month    | 2 (6.9%)  | 0         |
| 8. After g.w. 20: How often do you experience abdominal pain? | 2–3 days/month | 3 (10.3%) | 2 (8.3%)  |
|                                                               | 1 day/week     | 3 (10.3%) | 2 (8.3%)  |
|                                                               | >1 day/week    | 4 (13.8%) | 3 (12.5%) |
|                                                               | Every day      | 0         | 1 (4.2%)  |
| Total:                                                        |                | N = 29    | N = 24    |

<sup>1</sup> Kruskal–Wallis test for significance. \*  $p$ -value < 0.05

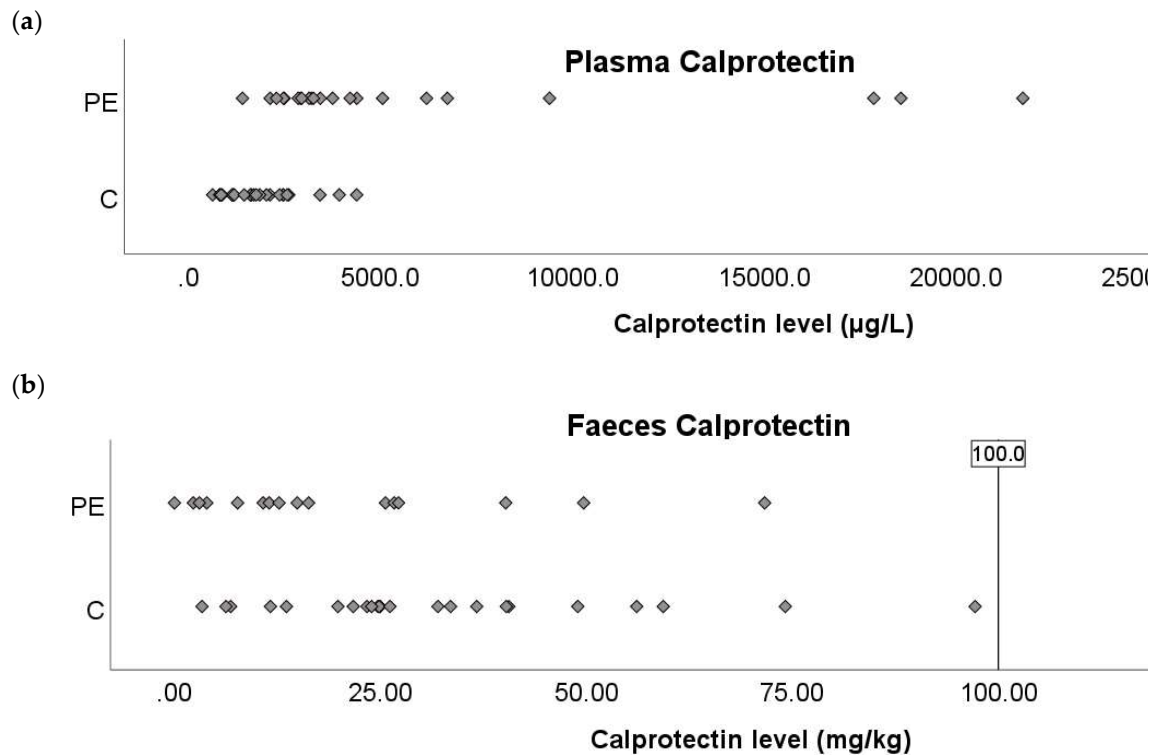

**Figure S1.** Plasma (a) and feces (b) calprotectin levels in controls vs. PE after excluding outliers, defined as values greater than  $Q3 + 1.5 \times IQR$  for each group. a) PE:  $N = 23$ , median 3443 µg/L, IQR 2867–6755 µg/L; C:  $N = 25$ , median 1711 µg/L, IQR 1157–2475 µg/L. b) PE:  $N = 17$ , median 14.9 mg/kg, IQR 5.8–33.7 mg/kg; C:  $N = 23$ , median 25.0 mg/kg, IQR 19.8–40.6 mg/kg. The line indicates the upper normal reference level for feces calprotectin. Mann–Whitney U-test for significance, \*\*\*  $p < 0.001$ .
